# Supplementary material for: The 30-Day Economic Burden of Newly Diagnosed Complicated Urinary Tract Infections in Medicare Fee-for-Service Patients Who Resided in the Community
Source: MDPI journal article supplement (doi:10.3390/antibiotics11050578), 2022-04-26
Supplement: s1 [file s1]

**Supplemental Table S1.** Algorithm for Identifying Medicare Beneficiaries with cUTIs Based on International Classification of Diseases, Tenth Revision (ICD-10) Diagnostic Codes and Procedure Codes and Current Procedural Terminology (CPT) Codes

| Group A                                       |                  | Group B                                                     |                  | Group C          |                  |
|-----------------------------------------------|------------------|-------------------------------------------------------------|------------------|------------------|------------------|
| Any code from this group qualifies as UTI     |                  | Any code from Group B qualifies as UTI                      |                  |                  |                  |
| Presence on inpatient claim qualifies as cUTI |                  | Group B code and Group C code on same day qualifies as cUTI |                  |                  |                  |
| ICD-10 diagnosis                              | ICD-10 diagnosis | ICD-10 diagnosis                                            | ICD-10 diagnosis | CPT code         | ICD-10 diagnosis |
| • N10                                         | • N35111         | • N139                                                      | • N3501          | • 51702          | • N329           |
| • N110                                        | • N35112         | • N300                                                      | 4                | • 51703          | • N3644          |
| • N118                                        | • N35113         | 0                                                           | • N3502          | ICD-10 procedure | • N400           |
|                                               | • N35114         | • N301                                                      | 8                | • OT9B70         | • N401           |
| • N12                                         | • N35119         | 0                                                           | • N351           | Z                | • N402           |
| • N151                                        | • T83510         | • N302                                                      | • N358           | • OT9B80         | • N403           |
| • N159                                        | A                | 0                                                           | • N359           | Z                | • N4283          |
| • N16                                         | • T83511         | • N303                                                      | • N360           | • OT2BX0         | • N9951          |
| • N288                                        | A                | 0                                                           | • N361           | Z                | 0                |
| 4                                             | • T83512         | • N304                                                      | • N362           | • 3C1ZX8         | • N9951          |
| • N288                                        | A                | 0                                                           | • N365           | Z                | 1                |
| 5                                             | • T83518         | • N308                                                      | • N368           | ICD-10 diagnosis | • N9951          |
| • N288                                        | A                | 0                                                           | • N9911          |                  | 2                |
| 6                                             |                  | • N309                                                      | 0                | • B0870          | • N9951          |
|                                               |                  | 0                                                           | • N37            | • B0871          | 8                |
|                                               |                  | • N300                                                      | • N390           | • B0872          | • Q6210          |
|                                               |                  | 1                                                           |                  | • N1330          | • Q6211          |
|                                               |                  | • N301                                                      |                  | • N1339          | • Q6212          |
|                                               |                  | 1                                                           |                  | • N139           | • Q6231          |
|                                               |                  | • N302                                                      |                  | • N200           | • Q6239          |
|                                               |                  | 1                                                           |                  | • N201           | • R338           |
|                                               |                  | • N303                                                      |                  | • N202           | • R339           |
|                                               |                  | 1                                                           |                  | • N209           | • R3914          |
|                                               |                  | • N304                                                      |                  | • N312           | • Z436           |
|                                               |                  | 1                                                           |                  | • N319           | • Z466           |
|                                               |                  | • N308                                                      |                  | • N320           |                  |
|                                               |                  | 1                                                           |                  | • N3289          |                  |
|                                               |                  | • N309                                                      |                  |                  |                  |
|                                               |                  | 1                                                           |                  |                  |                  |
|                                               |                  | • N340                                                      |                  |                  |                  |
|                                               |                  | • N341                                                      |                  |                  |                  |
|                                               |                  | • N342                                                      |                  |                  |                  |
|                                               |                  | • N343                                                      |                  |                  |                  |

**Supplemental Table S2.** Distribution of Diagnoses in 30-Day Post Index-cUTI period

| Total individuals                                                 | <i>n</i> | (N=723,324)<br>(%) |
|-------------------------------------------------------------------|----------|--------------------|
| HIV/AIDS                                                          | 2,961    | (0.4%)             |
| Septicemia, Sepsis, Systemic Inflammatory Response Syndrome/Shock | 132,711  | (18.3%)            |
| Opportunistic Infections                                          | 7,143    | (1.0%)             |
| Metastatic Cancer and Acute Leukemia                              | 31,018   | (4.3%)             |
| Lung and Other Severe Cancers                                     | 17,074   | (2.4%)             |
| Lymphoma and Other Cancers                                        | 17,094   | (2.4%)             |
| Colorectal, Bladder, and Other Cancers                            | 46,105   | (6.4%)             |
| Breast, Prostate, and Other Cancers and Tumors                    | 66,750   | (9.2%)             |
| Diabetes with Acute Complications                                 | 9,421    | (1.3%)             |
| Diabetes with Chronic Complications                               | 187,485  | (25.9%)            |
| Diabetes without Complication                                     | 92,486   | (12.8%)            |
| Protein-Calorie Malnutrition                                      | 53,653   | (7.4%)             |
| Morbid Obesity                                                    | 56,769   | (7.8%)             |
| Other Significant Endocrine and Metabolic Disorders               | 65,044   | (9.0%)             |
| End-Stage Liver Disease                                           | 7,859    | (1.1%)             |
| Cirrhosis of Liver                                                | 8,093    | (1.1%)             |
| Chronic Hepatitis                                                 | 6,016    | (0.8%)             |
| Intestinal Obstruction/Perforation                                | 37,244   | (5.1%)             |
| Chronic Pancreatitis                                              | 4,459    | (0.6%)             |
| Inflammatory Bowel Disease                                        | 12,977   | (1.8%)             |
| Bone/Joint/Muscle Infections/Necrosis                             | 18,053   | (2.5%)             |
| Rheumatoid Arthritis and Inflammatory Connective Tissue Disease   | 72,728   | (10.1%)            |
| Severe Hematological Disorders                                    | 9,708    | (1.3%)             |
| Disorders of Immunity                                             | 31,960   | (4.4%)             |
| Coagulation Defects and Other Specified Hematological Disorders   | 90,310   | (12.5%)            |
| Dementia with Complications                                       | 26,956   | (3.7%)             |
| Dementia without Complications                                    | 83,178   | (11.5%)            |
| Drug/Alcohol Psychosis                                            | 2,415    | (0.3%)             |
| Drug/Alcohol Dependence                                           | 30,242   | (4.2%)             |
| Substance Use Disorder, Mild, Except Alcohol and Cannabis         | 4,816    | (0.7%)             |
| Schizophrenia                                                     | 10,062   | (1.4%)             |
| Reactive & Unspecified Psychosis                                  | 7,480    | (1.0%)             |
| Major Depressive, Bipolar and Paranoid Disorders                  | 79,172   | (10.9%)            |
| Personality Disorders                                             | 3,484    | (0.5%)             |
| Quadriplegia                                                      | 10,600   | (1.5%)             |
| Paraplegia                                                        | 9,595    | (1.3%)             |
| Spinal Cord Disorders/Injuries                                    | 14,263   | (2.0%)             |
| Amyotrophic Lateral Sclerosis and Other Motor Neuron Disease      | 988      | (0.1%)             |

|                                                                                                     |         |         |
|-----------------------------------------------------------------------------------------------------|---------|---------|
| Cerebral Palsy                                                                                      | 4,708   | (0.7%)  |
| Myasthenia Gravis/Myoneural Disorders and Guillain-Barre Syndrome/Inflammatory and Toxic Neuropathy | 13,408  | (1.9%)  |
| Muscular Dystrophy                                                                                  | 755     | (0.1%)  |
| Multiple Sclerosis                                                                                  | 10,550  | (1.5%)  |
| Parkinson's and Huntington's Diseases                                                               | 25,455  | (3.5%)  |
| Seizure Disorders and Convulsions                                                                   | 39,142  | (5.4%)  |
| Coma, Brain Compression/Anoxic Damage                                                               | 13,764  | (1.9%)  |
| Respirator Dependence/Tracheostomy Status                                                           | 10,422  | (1.4%)  |
| Respiratory Arrest                                                                                  | 1,149   | (0.2%)  |
| Cardio-Respiratory Failure and Shock                                                                | 77,956  | (10.8%) |
| Congestive Heart Failure                                                                            | 179,585 | (24.8%) |
| Acute Myocardial Infarction                                                                         | 39,662  | (5.5%)  |
| Unstable Angina and Other Acute Ischemic Heart Disease                                              | 22,686  | (3.1%)  |
| Angina Pectoris                                                                                     | 35,272  | (4.9%)  |
| Specified Heart Arrhythmias                                                                         | 200,821 | (27.8%) |
| Cerebral Hemorrhage                                                                                 | 14,324  | (2.0%)  |
| Ischemic or Unspecified Stroke                                                                      | 54,014  | (7.5%)  |
| Hemiplegia/Hemiparesis                                                                              | 27,744  | (3.8%)  |
| Monoplegia, Other Paralytic Syndromes                                                               | 2,309   | (0.3%)  |
| Atherosclerosis of the Extremities with Ulceration or Gangrene                                      | 11,749  | (1.6%)  |
| Vascular Disease with Complications                                                                 | 37,128  | (5.1%)  |
| Vascular Disease                                                                                    | 198,689 | (27.5%) |
| Cystic Fibrosis                                                                                     | 202     | (0.0%)  |
| Chronic Obstructive Pulmonary Disease                                                               | 161,161 | (22.3%) |
| Fibrosis of Lung and Other Chronic Lung Disorders                                                   | 16,150  | (2.2%)  |
| Aspiration and Specified Bacterial Pneumonias                                                       | 29,447  | (4.1%)  |
| Pneumococcal Pneumonia, Empyema, Lung Abscess                                                       | 23,252  | (3.2%)  |
| Proliferative Diabetic Retinopathy and Vitreous Hemorrhage                                          | 8,444   | (1.2%)  |
| Exudative Macular Degeneration                                                                      | 17,995  | (2.5%)  |
| Dialysis Status                                                                                     | 16,283  | (2.3%)  |
| Acute Renal Failure                                                                                 | 168,405 | (23.3%) |
| Chronic Kidney Disease (Stage 5)                                                                    | 3,834   | (0.5%)  |
| Chronic Kidney Disease, Severe (Stage 4)                                                            | 8,238   | (1.1%)  |
| Chronic Kidney Disease, Severe (Stage 3)                                                            | 50,160  | (6.9%)  |
| Pressure Ulcer of Skin with Necrosis Through to Muscle, Tendon, or Bone                             | 5,874   | (0.8%)  |
| Pressure Ulcer of Skin with Full Thickness Skin Loss                                                | 13,399  | (1.9%)  |
| Pressure Ulcer of Skin with Partial Thickness Skin Loss                                             | 11,864  | (1.6%)  |
| Chronic Ulcer of Skin, Except Pressure                                                              | 12,253  | (1.7%)  |
| Severe Skin Burn or Condition                                                                       | 318     | (0.0%)  |
| Severe Head Injury                                                                                  | 244     | (0.0%)  |
| Major Head Injury                                                                                   | 12,766  | (1.8%)  |
| Vertebral Fractures without Spinal Cord Injury                                                      | 20,420  | (2.8%)  |

|                                                        |        |        |
|--------------------------------------------------------|--------|--------|
| Hip Fracture/Dislocation                               | 23,298 | (3.2%) |
| Traumatic Amputations and Complications                | 5,897  | (0.8%) |
| Complications of Specified Implanted Device or Graft   | 58,500 | (8.1%) |
| Major Organ Transplant or Replacement Status           | 4,453  | (0.6%) |
| Artificial Openings for Feeding or Elimination         | 31,363 | (4.3%) |
| Amputation Status, Lower Limb/Amputation Complications | 1,552  | (0.2%) |

---
